# Supplementary material
Source: PubMed Central journal article supplement (PMC8550954)
Supplement: 41380_2019_540_MOESM2_ESM.pdf [file 41380_2019_540_MOESM2_ESM.pdf]

# Chromosome 4 Locus

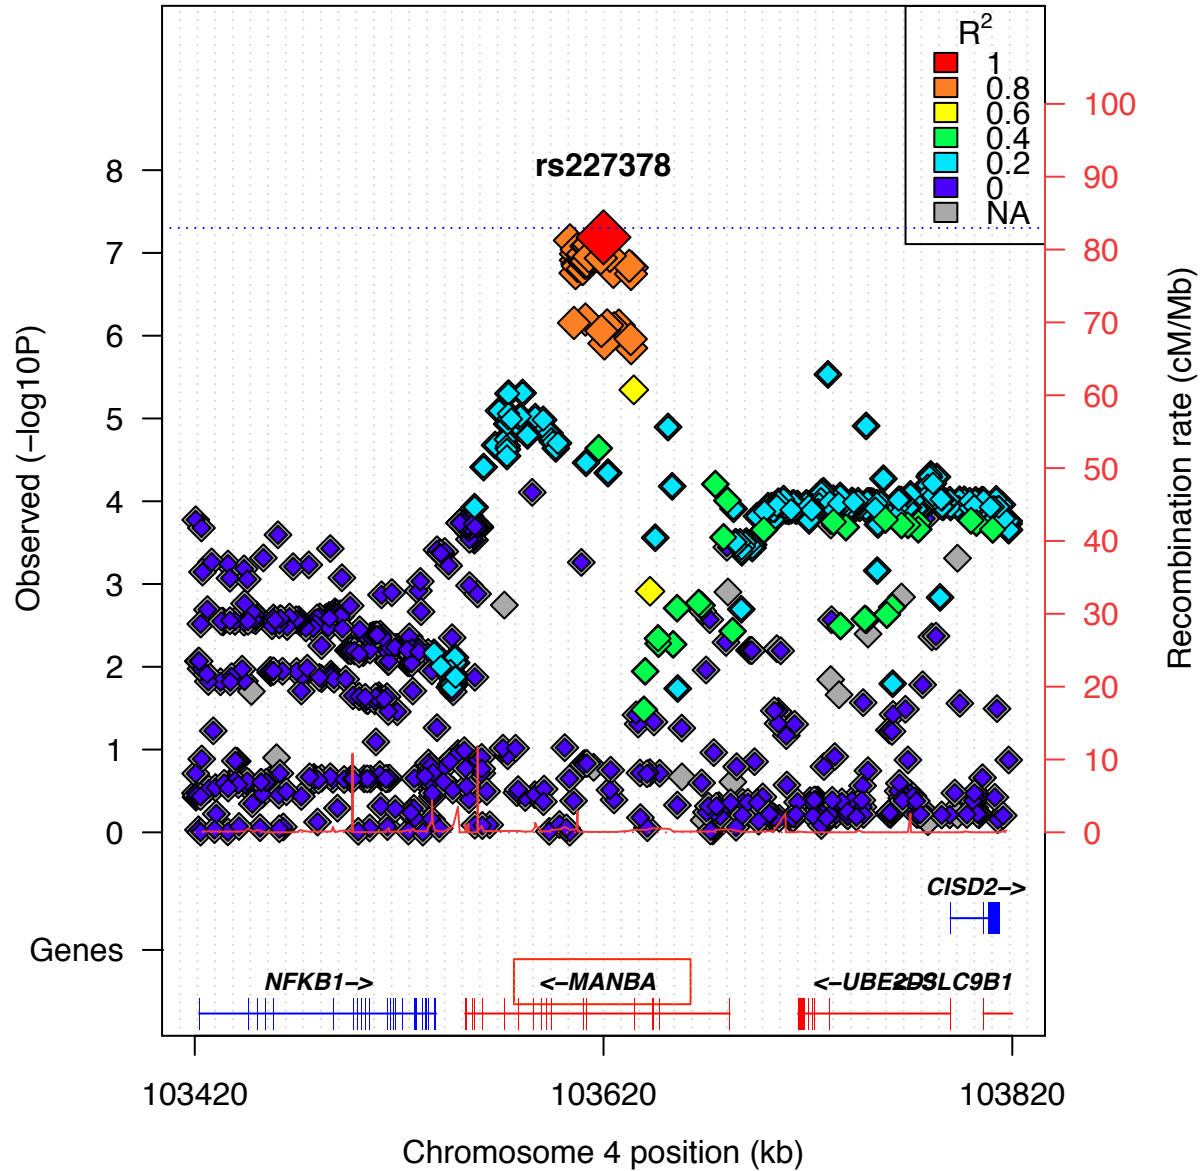

\*the gene in druggable genome is highlighted in red square
