# Supplementary material
Source: PubMed Central journal article supplement (PMC8550954)
Supplement: 41380_2019_540_MOESM4_ESM.pdf [file 41380_2019_540_MOESM4_ESM.pdf]

### Chromosome 3 Locus

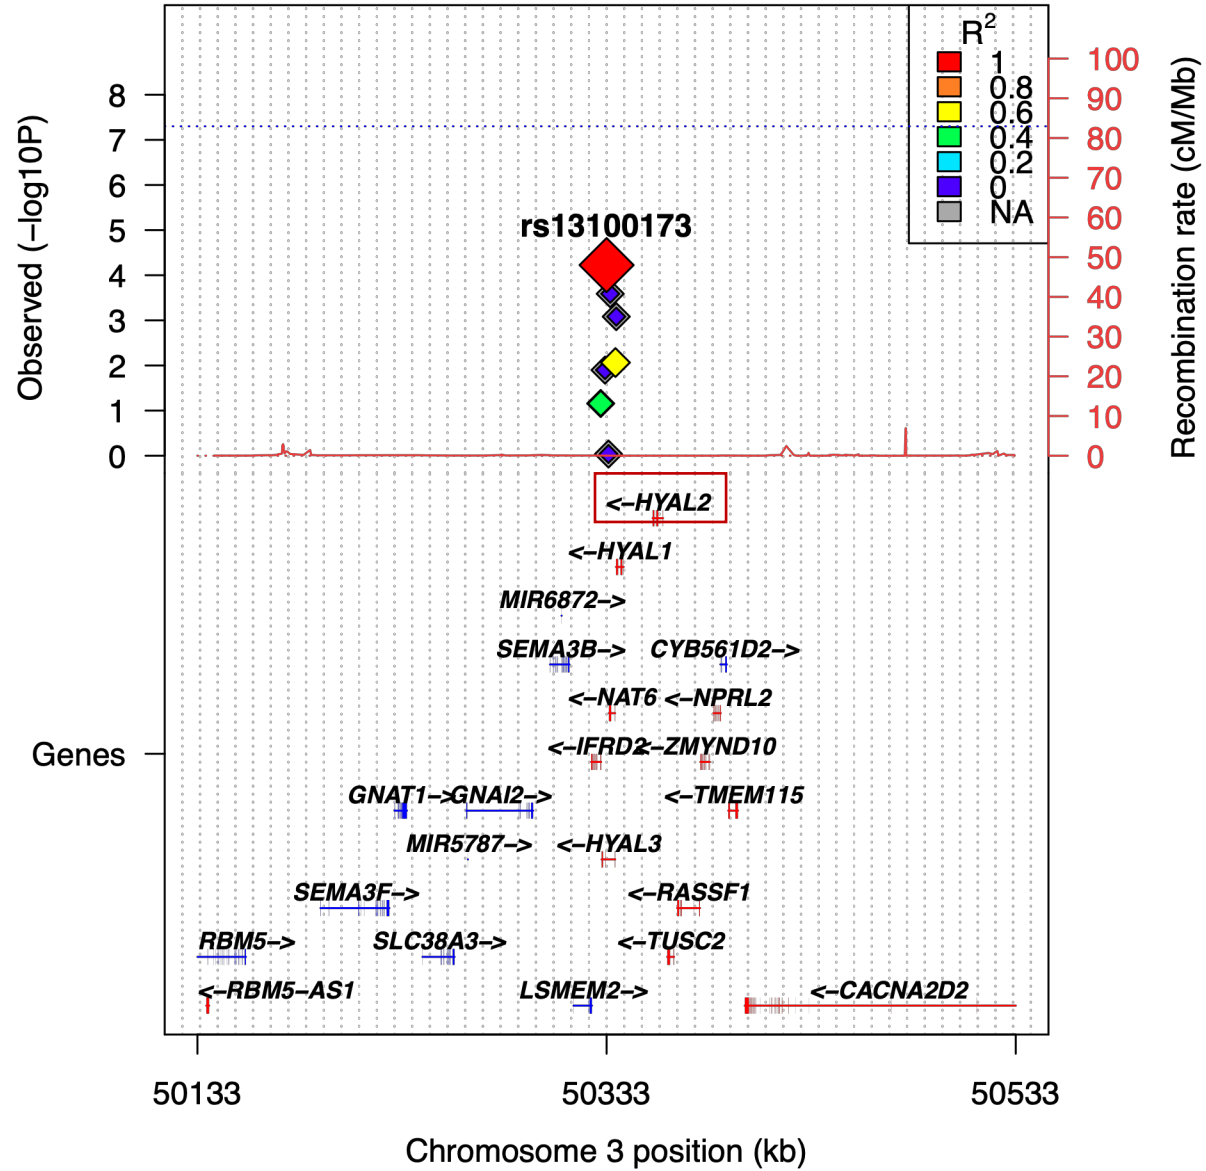

\* the genes in druggable genome are highlighted in red square
