# Supplementary material
Source: PubMed Central journal article supplement (PMC8550954)

# Supplementary Figure 5

## A) ADHD

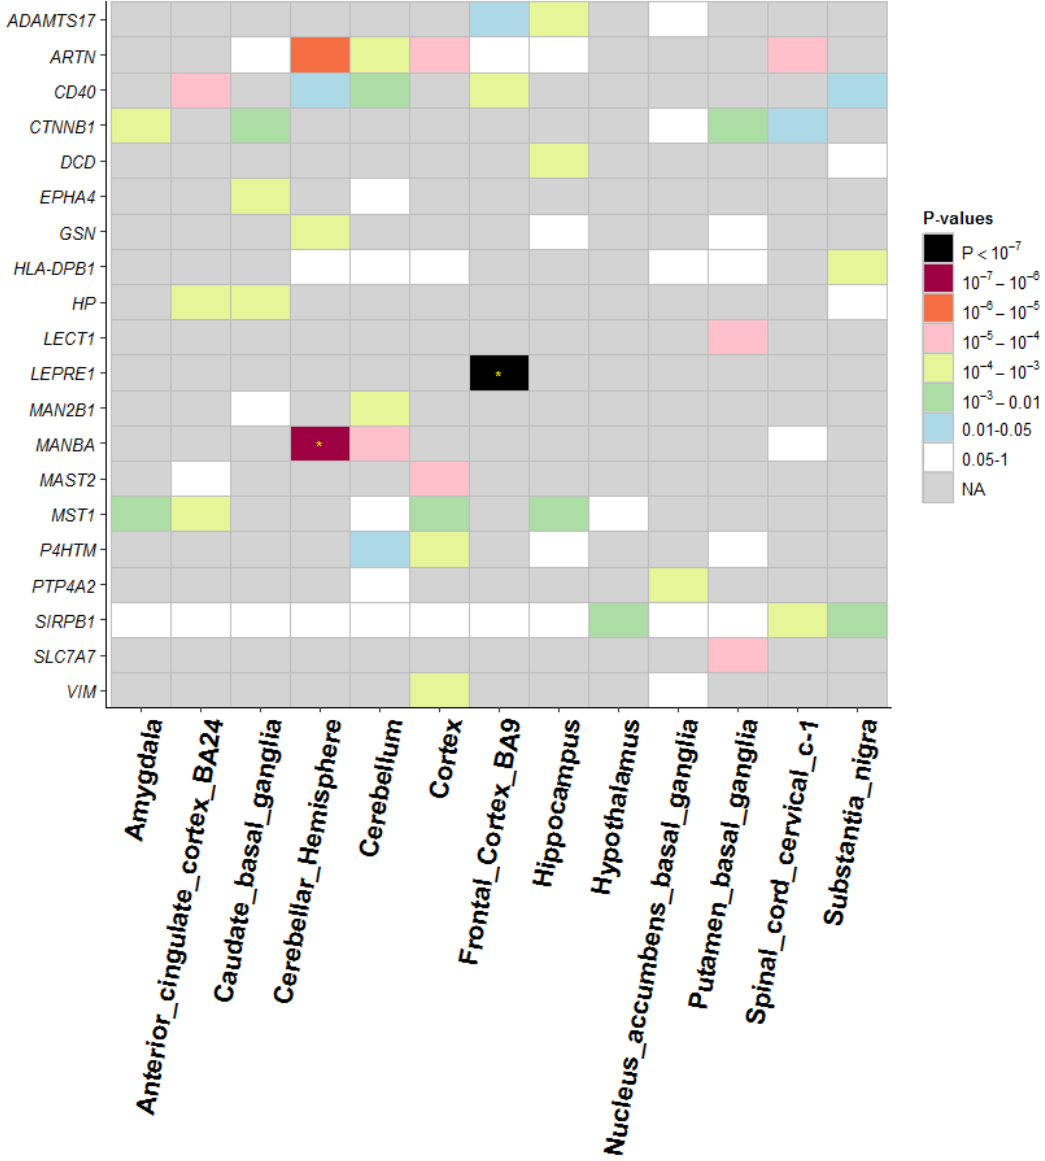





# Immune

## D) Asthma

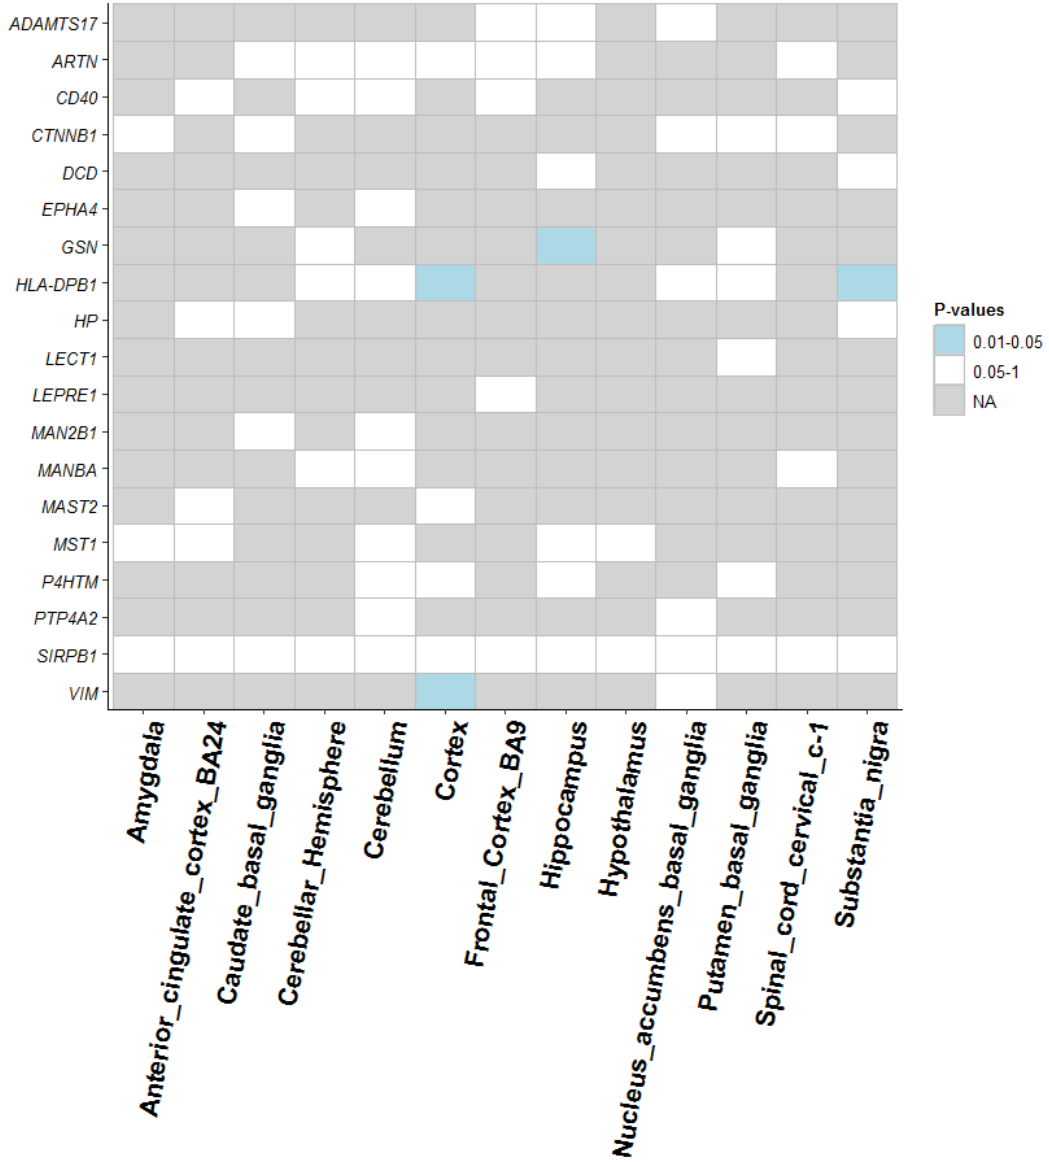

Supplement: 41380_2019_540_MOESM5_ESM.pdf [file 41380_2019_540_MOESM5_ESM.pdf]
